# Supplementary material
Source: publisher site journal article supplement (https://www.dovepress.com/article/358999)
Supplement: Supplementary file 1 [file get_supplementary_file.php]

**Table S1 Mean differences (95%CI) for metabolic variables of children aged 4 to 5 yrs across quartiles of maternal E2 levels**

|  |  | **Quartiles based on maternal E2** | | | | | | |
| --- | --- | --- | --- | --- | --- | --- | --- | --- |
|  |  | **Q1 (376 visits)**  **E2<2420** | **Q2 (388 visits)**  **2420≤E2＜3839** | **p value** | **Q3 (394 visits)**  **3839≤E2＜5599** | **p value** | **Q4 (417 visits)**  **E2≥5599** | **p value** |
| BMI, kg/m2 | Crude model | ref | 0(-0.37, 0.36) | 0.999 | 0.12(-0.24, 0.48) | 0.823 | 0.07(-0.29, 0.43) | 0.954 |
|  | Adjusted model | ref | -0.01(-0.35, 0.33) | 0.999 | 0.19(-0.15, 0.54) | 0.472 | 0.08(-0.26, 0.43) | 0.921 |
| FBG, mmol/l | Crude model | ref | -0.02(-0.09, 0.05) | 0.869 | 0.03(-0.04, 0.10) | 0.752 | 0.02(-0.05, 0.09) | 0.841 |
|  | Adjusted model | ref | -0.02(-0.09, 0.05) | 0.908 | 0.03(-0.04, 0.10) | 0.645 | 0.03(-0.04, 0.10) | 0.738 |
| Insulin, pmol/l **†** | Crude model | ref | 0.02(-0.09, 0.14) | 0.946 | -0.01(-0.13, 0.11) | 0.996 | 0(-0.11, 0.11) | 0.999 |
|  | Adjusted model | ref | 0.02(-0.09, 0.14) | 0.958 | 0.01(-0.11, 0.12) | 0.999 | 0(-0.11, 0.12) | 0.999 |
| HOMA-IR **†** | Crude model | ref | 0.02(-0.1, 0.14) | 0.974 | 0(-0.13, 0.12) | 0.999 | 0(-0.12, 0.13) | 0.999 |
|  | Adjusted model | ref | 0.02(-0.1, 0.14) | 0.98 | 0.01(-0.11, 0.14) | 0.993 | 0.01(-0.11, 0.13) | 0.997 |
| HOMA-β **†** | Crude model | ref | 0.04(-0.06, 0.15) | 0.707 | -0.01(-0.12, 0.09) | 0.985 | -0.02(-0.12, 0.08) | 0.966 |
|  | Adjusted model | ref | 0.04(-0.06, 0.14) | 0.771 | 0(-0.10, 0.10) | 0.999 | -0.02(-0.12, 0.08) | 0.962 |
| TC, mmol/l | Crude model | ref | -0.02(-0.14, 0.1) | 0.972 | -0.01(-0.13, 0.10) | 0.991 | 0.03(-0.09, 0.15) | 0.926 |
|  | Adjusted model | ref | -0.01(-0.13, 0.11) | 0.995 | 0.01(-0.11, 0.13) | 0.998 | 0.06(-0.06, 0.18) | 0.572 |
| TG, mmol/l | Crude model | ref | 0.01(-0.05, 0.06) | 0.990 | 0.03(-0.03, 0.08) | 0.540 | -0.01(-0.06, 0.05) | 0.990 |
|  | Adjusted model | ref | 0(-0.05, 0.06) | 0.997 | 0.03(-0.02, 0.09) | 0.475 | 0(-0.06, 0.05) | 0.996 |
| LDL-C, mmol/l | Crude model | ref | -0.01(-0.11, 0.08) | 0.984 | 0(-0.10, 0.10) | 0.999 | -0.01(-0.10, 0.09) | 0.998 |
| Adjusted model | ref | -0.01(-0.11, 0.09) | 0.994 | 0.02(-0.08, 0.12) | 0.965 | 0.03(-0.07, 0.12) | 0.899 |
| HDL-C, mmol/l | Crude model | ref | -0.02(-0.07, 0.03) | 0.719 | -0.03(-0.08, 0.02) | 0.426 | 0.01(-0.04, 0.06) | 0.878 |
| Adjusted model | ref | -0.01(-0.06, 0.04) | 0.895 | -0.03(-0.08, 0.02) | 0.466 | 0.01(-0.04, 0.06) | 0.915 |

Note: Mean differences were obtained from linear mixed-effects regression model.

**†** log-transformed insulin, HOMA-IR, HOMA-β values were considered continuous variables.

Adjusted model: adjusted for maternal age, BMI, paternal age, BMI, cycle type, number of embryos transferred, stage of embryo transfer, offspring gestational age, birth weight, sex and age at visit.

BMI, body mass index; E2, estradiol; FBG, fasting blood glucose; HDL-C, high-density lipoprotein cholesterol; HOMA-IR, homeostatic model assessment for insulin resistance; HOMA-β, homeostatic model assessment of beta cell function; LDL-C, low-density lipoprotein cholesterol; TC, total cholesterol; TG, triacylglycerol.

**Table S2 Mean differences (95%CI) for metabolic variables of children aged 6 to 9 yrs across quartiles of maternal peak E2 levels**

|  |  | **Quartiles based on maternal peak E2** | | | | | | |
| --- | --- | --- | --- | --- | --- | --- | --- | --- |
|  |  | **Q1 (275 visits)**  **E2<2420** | **Q2 (266 visits)**  **2420≤E2＜3839** | **p value** | **Q3 (307 visits)**  **3839≤E2＜5599** | **p value** | **Q4 (332 visits)**  **E2≥5599** | **p value** |
| BMI, kg/m2 | Crude model | ref | -0.06(-0.51, 0.39) | 0.985 | -0.01(-0.45, 0.42) | 0.999 | -0.07(-0.5, 0.35) | 0.973 |
|  | Adjusted model | ref | -0.13(-0.56, 0.29) | 0.850 | 0(-0.41, 0.41) | 0.999 | -0.01(-0.42, 0.39) | 0.999 |
| FBG, mmol/l | Crude model | ref | -0.03(-0.12, 0.06) | 0.812 | 0(-0.08, 0.09) | 0.999 | 0.03(-0.06, 0.11) | 0.827 |
|  | Adjusted model | ref | -0.03(-0.12, 0.05) | 0.768 | 0(-0.08, 0.09) | 0.999 | 0.04(-0.05, 0.12) | 0.66 |
| Insulin, pmol/l **†** | Crude model | ref | 0(-0.15, 0.14) | 0.999 | -0.01(-0.15, 0.13) | 0.999 | -0.03(-0.17, 0.10) | 0.920 |
|  | Adjusted model | ref | -0.03(-0.18, 0.11) | 0.927 | 0(-0.14, 0.13) | 0.999 | -0.02(-0.15, 0.12) | 0.989 |
| HOMA-IR **†** | Crude model | ref | -0.01(-0.16, 0.14) | 0.999 | -0.01(-0.15, 0.14) | 0.999 | -0.03(-0.17, 0.12) | 0.959 |
|  | Adjusted model | ref | -0.04(-0.19, 0.11) | 0.901 | 0(-0.15, 0.14) | 0.999 | -0.01(-0.15, 0.14) | 0.999 |
| HOMA-β **†** | Crude model | ref | 0.03(-0.10, 0.16) | 0.939 | 0.01(-0.11, 0.13) | 0.997 | -0.05(-0.18, 0.07) | 0.669 |
|  | Adjusted model | ref | 0(-0.13, 0.13) | 0.999 | 0.01(-0.11, 0.13) | 0.993 | -0.04(-0.16, 0.08) | 0.781 |
| TC, mmol/l | Crude model | ref | 0.06(-0.09, 0.21) | 0.734 | 0.07(-0.07, 0.21) | 0.617 | 0.03(-0.11, 0.17) | 0.953 |
|  | Adjusted model | ref | 0.07(-0.08, 0.22) | 0.598 | 0.09(-0.05, 0.24) | 0.323 | 0.06(-0.08, 0.2) | 0.673 |
| TG, mmol/l | Crude model | ref | 0.04(-0.03, 0.11) | 0.523 | 0.01(-0.06, 0.08) | 0.98 | 0.01(-0.06, 0.08) | 0.976 |
|  | Adjusted model | ref | 0.03(-0.04, 0.10) | 0.716 | 0.01(-0.06, 0.08) | 0.97 | 0.02(-0.05, 0.08) | 0.936 |
| LDL-C, mmol/l | Crude model | ref | 0.03(-0.09, 0.15) | 0.946 | -0.01(-0.12, 0.11) | 0.999 | 0(-0.12, 0.11) | 0.999 |
| Adjusted model | ref | 0.04(-0.08, 0.16) | 0.856 | 0.03(-0.09, 0.14) | 0.931 | 0.03(-0.08, 0.15) | 0.883 |
| HDL-C, mmol/l | Crude model | ref | 0.01(-0.05, 0.07) | 0.974 | 0.05(-0.01, 0.11) | 0.099 | 0.03(-0.03, 0.09) | 0.585 |
| Adjusted model | ref | 0.02(-0.04, 0.08) | 0.876 | 0.05(-0.01, 0.11) | 0.127 | 0.03(-0.03, 0.09) | 0.620 |

Note: Mean differences were obtained from linear mixed-effects regression model.

**†** loge-transformed Insulin, HOMA-IR, HOMA-β were considered continuous variables.

Adjusted model: adjusted for maternal age, BMI, paternal age, BMI, cycle type, number of embryos transferred, stage of embryo transfer, offspring gestational age, birth weight, sex and age at visit.

BMI, body mass index; E2, estradiol; FBG, fasting blood glucose; HDL-C, high-density lipoprotein cholesterol; HOMA-IR, homeostatic model assessment for insulin resistance; HOMA-β, homeostatic model assessment of beta cell function; LDL-C, low-density lipoprotein cholesterol; TC, total cholesterol; TG, triacylglycerol.
